# Supplementary material
Source: PubMed Central journal article supplement (PMC2815246)
Supplement: NIHMS159298-supplement-1_si_001.pdf [file NIHMS159298-supplement-1_si_001.pdf]

Table 1. Size distribution parameters of micellar and nanoemulsion systems at room temperature.

| Samples                                     | Peak 1        |                    | Peak 2        |                    | Peak 3        |                    |
|---------------------------------------------|---------------|--------------------|---------------|--------------------|---------------|--------------------|
|                                             | Radius,<br>nm | Volume<br>fraction | Radius,<br>nm | Volume<br>fraction | Radius,<br>nm | Volume<br>fraction |
| 0.25% PEG-PLLA<br>micellar solution         | 22.2          | 15%                | 114.7         | 85%                | -             | -                  |
| GEN in 0.25% PEG-<br>PLLA micellar solution | 29.3          | 69%                | 188.9         | 31%                | -             | -                  |
| 1% PFP/0.25% PEG-<br>PLLA emulsion          | -             | -                  | 117.5         | 27%                | 592.6         | 73%                |
| GEN in 1% PFP/0.25%<br>PEG-PLLA emulsion    | 19.3          | 7%                 | 122.9         | 31%                | 718.4         | 62%                |
